# Supplementary material for: The Psychological Impact of Coronavirus Disease 2019 on Patients Attending a Tertiary Healthcare Facility in Pakistan: A Cross-Sectional Study
Source: MDPI journal article supplement (doi:10.3390/healthcare10061049), 2022-06-05
Supplement: s1 [file s1]

# **DASS-21 and PCL-5 in Treated COVID-19 Patients:**

This is a questionnaire to measure Depression, Anxiety and PTSD in treated COVID-19 patients and Healthcare Workers.

صحت یاب کرونا وائرس کے مریضوں اور ہیلتھ کیئر ورکرز میں افسردگی ، بے چینی اور تناؤ کی پیمائش کرنے کے لئے سوالنامہ۔

Name/ نام : \_\_\_\_\_

Age/عمر: \_\_\_\_\_

Gender/جنس: \_\_\_\_\_

Education/تعلیم: \_\_\_\_\_

Occupation/پیشہ: \_\_\_\_\_

Healthcare Worker/ورکر(yes/no): \_\_\_\_\_

History of interaction with COVID-19 patient in hospital as Frontline worker/ہسپتال میں کرونا وائرس کے مریضوں کا علاج کیا فرنٹ لائن پر: \_\_\_\_\_

Severity of Disease/بیماری کی شدت(Mild/Moderate/Severe/Critical): \_\_\_\_\_

Current Condition/موجودہ حالت (same as before illness/worse/better) : \_\_\_\_\_

## **مطلع شدہ اجازت نامہ/Informed Consent:**

I hereby give my consent for clinical information related to me to be reported for research purposes.

I understand that my name and identity will be concealed.

Once signed I cannot revoke consent.

\_\_\_\_\_  
(Patient's Signatures/دستخط)

**DASS-21 Questionnaire:** (Encircle the right option/ صحیح انتخاب پر دائرہ لگائیں)

| Sr. No. | Characteristics/ خصوصیات                                                                                                                                                                             | Never<br>کبھی<br>نہیں<br>(0) | Some<br>times<br>کبھی<br>کبھار<br>(1) | Often<br>اکثر<br>اوقات<br>(2) | Always<br>ہر وقت<br>(3) |
|---------|------------------------------------------------------------------------------------------------------------------------------------------------------------------------------------------------------|------------------------------|---------------------------------------|-------------------------------|-------------------------|
| 1.      | I found it hard to wind down.<br>میرے لئے پر سکون رہنا مشکل ہو رہا تھا۔                                                                                                                              | 0                            | 1                                     | 2                             | 3                       |
| 2.      | I was aware of dryness of my mouth.<br>میں اپنے منہ کے سوکھے پن سے واقف تھا۔                                                                                                                         | 0                            | 1                                     | 2                             | 3                       |
| 3.      | I couldn't seem to experience any positive feeling at all.<br>مجھے کسی قسم کے مثبت جذبات محسوس نہیں ہوئے۔                                                                                            | 0                            | 1                                     | 2                             | 3                       |
| 4.      | I experienced breathing difficulty (e.g. excessively rapid breathing, breathlessness in the absence of physical exertion).<br>مجھے سانس لینے میں دشواری کا سامنا کرنا پڑا (بغیر کسی قسم کی مشقت کے)۔ | 0                            | 1                                     | 2                             | 3                       |
| 5.      | I found it difficult to work up the initiative to do things.<br>مجھے کسی کام کے کرنے کے لئے آغاز کرنا مشکل محسوس ہوتا رہا ہے۔                                                                        | 0                            | 1                                     | 2                             | 3                       |
| 6.      | I tended to over-react to situations.<br>میں نے بعض حالات میں غیر ضروری ردعمل کا اظہار کیا۔                                                                                                          | 0                            | 1                                     | 2                             | 3                       |
| 7.      | I experienced trembling (e.g. in the hands).<br>مجھے کپکپاہٹ محسوس ہوتی رہی ہے (مثلاً ہاتھوں میں)۔                                                                                                   | 0                            | 1                                     | 2                             | 3                       |
| 8.      | I felt that I was using a lot of nervous energy.<br>میں نے محسوس کیا کہ میں بہت زیادہ ذہنی توانائی استعمال کر رہا/رہی ہوں۔                                                                           | 0                            | 1                                     | 2                             | 3                       |
| 9.      | I was worried about situations in which I might panic and make a fool of myself.<br>میں ایسے حالات سے گھبراتا رہا جن میں میری بے چینی بڑھنے اور احمق بننے کا خدشہ تھا۔                               | 0                            | 1                                     | 2                             | 3                       |

|     |                                                                                                                                                                                                               |   |   |   |   |
|-----|---------------------------------------------------------------------------------------------------------------------------------------------------------------------------------------------------------------|---|---|---|---|
| 10. | I felt that I had nothing to look forward to.<br>میں اپنا مستقبل تاریک محسوس کرتا رہ / کرتی رہی۔                                                                                                              | 0 | 1 | 2 | 3 |
| 11. | I found myself getting agitated.<br>مجھے اپنے آپ میں چڑچڑا پن محسوس ہوتا رہا۔                                                                                                                                 | 0 | 1 | 2 | 3 |
| 12. | I found it difficult to relax.<br>میں ذہنی طور پر بے سکونی محسوس کرتا رہا۔                                                                                                                                    | 0 | 1 | 2 | 3 |
| 13. | I felt down-hearted and blue.<br>میں اداسی محسوس کرتا رہا / رہی۔                                                                                                                                              | 0 | 1 | 2 | 3 |
| 14. | I was intolerant of anything that kept me from getting on with what I was doing.<br>میرے لئے اس چیز کو برداشت کرنا مشکل ہو رہا تھا جو میرے کام میں رکاوٹ پیدا کرے۔                                            | 0 | 1 | 2 | 3 |
| 15. | I felt I was close to panic.<br>مجھے محسوس ہوتا تھا جیسے مجھے دورہ پڑنے لگا ہے۔                                                                                                                               | 0 | 1 | 2 | 3 |
| 16. | I was unable to become enthusiastic about anything.<br>مجھے کسی بھی کام میں دلچسپی نہیں رہی۔                                                                                                                  | 0 | 1 | 2 | 3 |
| 17. | I felt I wasn't worth much as a person.<br>مجھے محسوس ہوتا رہا کہ میں کسی قابل نہیں ہوں۔                                                                                                                      | 0 | 1 | 2 | 3 |
| 18. | I felt that I was rather touchy.<br>مجھے محسوس ہوا کہ میں بہت جزیاتی ہو جاتا ہوں۔                                                                                                                             | 0 | 1 | 2 | 3 |
| 19. | I was aware of the action of my heart in the absence of physical exertion (e.g. sense of heart rate increase, heart missing a beat).<br>مجھے بلا وجہ، بغیر کسی جسمانی مشقت کے دل کی دھڑکن تیز محسوس ہوتی رہی۔ | 0 | 1 | 2 | 3 |

|     |                                                                                            |   |   |   |   |
|-----|--------------------------------------------------------------------------------------------|---|---|---|---|
| 20. | I felt scared without any good reason.<br>میں بغیر کسی وجہ کے خوفزدہ محسوس کرتا رہا / رہی۔ | 0 | 1 | 2 | 3 |
| 21. | I felt that life was meaningless.<br>مجھے یہ احساس ہوتا رہا کہ زندگی بے معنی ہے۔           | 0 | 1 | 2 | 3 |

**PCL-5 Questionnaire:** (Encircle the right option/صحیح انتخاب پر دائرہ لگائیں)

| Sr. No. | In the past month, how much you were bothered by:<br>پچھلے مہینے میں، آپ ان باتوں سے کتنے پریشان ہوئے تھے:                                                                                                                                                                                                                       | Not at all/<br>بالکل نہیں<br>(0) | A little bit/<br>تھوڑا بہت<br>(1) | Moderately/<br>کسی حد تک<br>(2) | Quite a bit/<br>کافی حد تک<br>(3) | Extremely/<br>بے حد<br>(4) |
|---------|----------------------------------------------------------------------------------------------------------------------------------------------------------------------------------------------------------------------------------------------------------------------------------------------------------------------------------|----------------------------------|-----------------------------------|---------------------------------|-----------------------------------|----------------------------|
| 1.      | Repeated, disturbing, and unwanted memories of the stressful experience?<br>پریشان کن، اور ذہنی دباؤ والے تجربے کی ناپسندیدہ یادیں بار بار آنا؟                                                                                                                                                                                  | 0                                | 1                                 | 2                               | 3                                 | 4                          |
| 2.      | Repeated, disturbing dreams of the stressful experience?<br>ذہنی دباؤ والے تجربے کے بار بار، پریشان کن خواب آنا؟                                                                                                                                                                                                                 | 0                                | 1                                 | 2                               | 3                                 | 4                          |
| 3.      | Suddenly feeling or acting as if the stressful experience were actually happening again (as if you were actually back there reliving it)?<br>اچانک محسوس کرنا یا عمل کرنا جیسے ذہنی دباؤ والا تجربہ دوبارہ ہو رہا ہو (گویا واقعتاً آپ واپس اسی کیفیت میں مبتلا ہو رہے ہیں)؟                                                      | 0                                | 1                                 | 2                               | 3                                 | 4                          |
| 4.      | Feeling very upset when something reminded you of the stressful experience?<br>جب آپ کو کوئی بات اس پریشان کن تجربے کی یاد دلوانے تو آپ بہت پریشانی محسوس کر تے ہوں؟                                                                                                                                                             | 0                                | 1                                 | 2                               | 3                                 | 4                          |
| 5.      | Having strong physical reactions when something reminded you of the stressful experience (for example, heart pounding, trouble breathing, sweating)?<br>جب آپ کو کوئی بات اس ذہنی دباؤ والے وقت کی یاد دلاتی ہے تو آپ کو سخت جسمانی ردعمل کا سامنا کرنا پڑتا ہے (مثال کے طور پر، دل کا دھڑکنا، سانس لینے میں دشواری، پسینہ آنا)؟ | 0                                | 1                                 | 2                               | 3                                 | 4                          |
| 6.      | Avoiding memories, thoughts, or feelings related to the stressful experience?<br>ذہنی دباؤ والے تجربے سے متعلق یادوں، خیالات، یا                                                                                                                                                                                                 | 0                                | 1                                 | 2                               | 3                                 | 4                          |

|     | احساسات سے بچنا؟                                                                                                                                                                                                                                                                                                                                                                                                                               |   |   |   |   |   |
|-----|------------------------------------------------------------------------------------------------------------------------------------------------------------------------------------------------------------------------------------------------------------------------------------------------------------------------------------------------------------------------------------------------------------------------------------------------|---|---|---|---|---|
| 7.  | <b>Avoiding external reminders of the stressful experience (for example, people, places, conversations, activities, objects, or situations)?</b><br>پریشان کن تجربے کی بیرونی یاد دہانیوں سے بچنا (مثال کے طور پر لوگوں ، مقامات ، گفتگو ، سرگرمیوں ، اشیاء یا حالات وغیرہ سے)؟                                                                                                                                                                | 0 | 1 | 2 | 3 | 4 |
| 8.  | <b>Trouble remembering important parts of the stressful experience?</b><br>دباؤ والے تجربے کے اہم حصوں کو یاد رکھنے میں پریشانی کا سامنا کرنا؟                                                                                                                                                                                                                                                                                                 | 0 | 1 | 2 | 3 | 4 |
| 9.  | <b>Having strong negative beliefs about yourself, other people, or the world (for example, having thoughts such as: I am bad, there is something seriously wrong with me, no one can be trusted, the world is completely dangerous)?</b><br>اپنے ، دوسرے لوگوں ، یا دنیا کے بارے میں سخت منفی عقائد رکھنے (مثلاً: ایسے خیالات رکھنا جیسے: میں برا ہوں ، میرے ساتھ کوئی سنجیدہ مسئلہ ہے ، کسی پر اعتبار نہیں کیا جاسکتا ، پوری دنیا خطرناک ہے)؟ | 0 | 1 | 2 | 3 | 4 |
| 10. | <b>Blaming yourself or someone else for the stressful experience or what happened after it?</b><br>پریشان کن تجربے کے لئے اپنے آپ کو یا کسی اور کو مورد الزام ٹھہرانا یا اس کے بعد جو کچھ بھی ہوا؟                                                                                                                                                                                                                                             | 0 | 1 | 2 | 3 | 4 |
| 11. | <b>Having strong negative feelings such as fear, horror, anger, guilt, or shame?</b><br>سخت منفی جذبات جیسے خوف ، وحشت ، غصہ ، جرم یا شرم کا محسوس ہونا؟                                                                                                                                                                                                                                                                                       | 0 | 1 | 2 | 3 | 4 |
| 12. | <b>Loss of interest in activities that you used to enjoy?</b><br>جن سرگرمیوں سے آپ لطف اندوز ہوتے تھے ان میں دلچسپی ختم ہونا؟                                                                                                                                                                                                                                                                                                                  | 0 | 1 | 2 | 3 | 4 |
| 13. | <b>Feeling distant or cut off from other people?</b><br>دوسرے لوگوں سے دور ہونا یا منقطع محسوس کرنا؟                                                                                                                                                                                                                                                                                                                                           | 0 | 1 | 2 | 3 | 4 |

|     |                                                                                                                                                                                                                                                                                             |   |   |   |   |   |
|-----|---------------------------------------------------------------------------------------------------------------------------------------------------------------------------------------------------------------------------------------------------------------------------------------------|---|---|---|---|---|
| 14. | Trouble experiencing positive feelings (for example, being unable to feel happiness or have loving feelings for people close to you)?<br>مثبت احساسات کے محسوس کرنے میں مشکل ہونا<br>(مثال کے طور پر ، آپ کے قریبی لوگوں کے لئے<br>خوشی محسوس کرنے یا محبت کے جذبات رکھنے<br>سے قاصر ہونا)؟ | 0 | 1 | 2 | 3 | 4 |
| 15. | Irritable behavior, angry outbursts, or acting aggressively?<br>چڑچڑا پن ، ناراض ہو جانا ، یا جارحانہ انداز میں عمل<br>کرنا؟                                                                                                                                                                | 0 | 1 | 2 | 3 | 4 |
| 16. | Taking too many risks or doing things that could cause you harm?<br>بہت زیادہ خطرات مول لینا یا ایسی چیزیں کرنا جو آپ<br>کو نقصان پہنچا سکتی ہوں؟                                                                                                                                           | 0 | 1 | 2 | 3 | 4 |
| 17. | Being “superalert” or watchful or on guard?<br>بہت زیادہ چوکنے ، بہت زیادہ ہوشیار اور مستعد رہنا؟                                                                                                                                                                                           | 0 | 1 | 2 | 3 | 4 |
| 18. | Feeling jumpy or easily startled?<br>بے صبری محسوس ہونا یا آسانی سے چونک جانا؟                                                                                                                                                                                                              | 0 | 1 | 2 | 3 | 4 |
| 19. | Having difficulty concentrating?<br>دھیان دینے میں دشواری ہونا؟                                                                                                                                                                                                                             | 0 | 1 | 2 | 3 | 4 |
| 20. | Trouble falling or staying asleep?<br>سونے میں یا سوتے رہنے میں دقت محسوس ہونا؟                                                                                                                                                                                                             | 0 | 1 | 2 | 3 | 4 |
